# Supplementary material
Source: PubMed Central journal article supplement (PMC3795908)
Supplement: NIHMS517206-supplement-1.pdf [file NIHMS517206-supplement-1.pdf]

**Table S1. SiRNA sequences**

| <b>Targets</b>         | <b>siRNAs</b>               | <b>Direction</b> | <b>miRNA sequences</b>            |
|------------------------|-----------------------------|------------------|-----------------------------------|
| <b>ASNS</b>            | siASNS-1                    | Sense            | 5'-r(GGAUACUGCCAAUAAG AAA)dTdT-3' |
|                        |                             | Antisense        | 5'-r(UUUCUUAUUGGCAGUAUCC)dAdG-3'  |
|                        | siASNS-2                    | Sense            | 5'-r(GAAGCUAAAGGUCUUGUUA)dTdT-3'  |
|                        |                             | Antisense        | 5'-r(UAACAAGACCUUUAGCUUC)dTdG-3'  |
| <b>MMP19</b>           | siMMP19-1                   | Sense            | 5'-r(AGAACCCAGUCCCAUGCCA) dTdT-3' |
|                        |                             | Antisense        | 5'-r(UGGCAUGGGACUGGGUUCU)dGdT-3'  |
|                        | siMMP19-2                   | Sense            | 5'-r(CUAUUGGCCUCUCAACCAA)dTdT-3'  |
|                        |                             | Antisense        | 5'-r(UUGGUUGAGAGGCCAAUAG)dAdG-3'  |
| <b>CGA<sup>1</sup></b> | Hs_CGA_5 HP Validated siRNA |                  |                                   |
|                        | Hs_CGA_6 HP Validated siRNA |                  |                                   |

<sup>1</sup> siRNAs purchased from QIAGEN

**Table S2. Primer sequences.**

| Gene          | Direction | Primers for PCR Cloning            | Primers for Quantitative PCR  |
|---------------|-----------|------------------------------------|-------------------------------|
| <b>ASNS</b>   | Forward   | 5'-AGGGCTAGCTTATAGCTTCATTGCACCA-3' | 5'-TTTGCAATTGGCATGGAAGA-3'    |
|               | Reverse   | 5'-TACCTCGAGCATAAAGACCACCTAAGC-3'  | 5'-TGATCTGCCACCTTTCTAGCAG-3'  |
| <b>MMP19</b>  | Forward   | 5'-AAAAAGCTTCTGGAGCTCTCGTCTGGT-3'  | 5'-CACTTTAAGCTGCACCCAGA-3'    |
|               | Reverse   | 5'-ATGCTCGAGATTGTGTCTGTGGGTG-3'    | 5'-TCACTGGACTCTTCTTGCCATA-3'  |
| <b>CGA</b>    | Forward   |                                    | 5'-TTCTCCATTCCGCTCCTGAT-3'    |
|               | Reverse   |                                    | 5'-GGGTTTTCTGTAGCGTGCAT-3'    |
| <b>XPA</b>    | Forward   |                                    | 5'-TCCACATCATTACAATGGG-3'     |
|               | Reverse   |                                    | 5'-TGTCGGACTTCCTTTGCTTC-3'    |
| <b>XPC</b>    | Forward   |                                    | 5'-TCGTGGAGAAGCGGTCTACT-3'    |
|               | Reverse   |                                    | 5'-GCCTCACCCTCTTGCTTTC-3'     |
| <b>RPA32</b>  | Forward   |                                    | 5'-TAGCTTCATGCCAGCAAATG-3'    |
|               | Reverse   |                                    | 5'-TTCAACCCTCAGGTCTTGG-3'     |
| <b>Rad23B</b> | Forward   |                                    | 5'-GGGTGATTCTTCTCGGTCAA-3'    |
|               | Reverse   |                                    | 5'-CTTGCTCTCGTTCATAGCCC-3'    |
| <b>Bcl-2</b>  | Forward   |                                    | 5'-GACAGAGGATCATGCTGTACTTA-3' |
|               | Reverse   |                                    | 5'-CTTGGCATGAGATGCAGGAA-3'    |
| <b>BirC5</b>  | Forward   |                                    | 5'-GGACCACCGCATCTCTACAT-3'    |
|               | Reverse   |                                    | 5'-CCAAGTCTGGCTCGTTCTCA-3'    |
| <b>XIAP</b>   | Forward   |                                    | 5'-ATTCACTTGAGGAGTGTCTGGT-3'  |
|               | Reverse   |                                    | 5'-TGCCTTGAACTGAACCCCA-3'     |
| <b>GAPDH</b>  | Forward   |                                    | 5'-ATGGAAATCCCATCACCATCTT-3'  |
|               | Reverse   |                                    | 5'-GCCCCACTTGATTTTGGAG-3'     |
